# Supplementary material for: Developing intercalation based anode materials for fluoride-ion batteries: topochemical reduction of Sr2TiO3F2via a hydride based defluorination process
Source: Royal Society of Chemistry journal article supplement (doi:10.1039/c8ta01012a), 2018-01-01
Supplement: c8ta01012a1.pdf [file c8ta01012a1.pdf]

# Electronic Supplementary Material

## Developing intercalation based anode materials for fluoride-ion batteries: Topochemical reduction of $\text{Sr}_2\text{TiO}_3\text{F}_2$ via a hydride based defluorination process

Kerstin Wissel<sup>a</sup>, Supratik Dasgupta<sup>b</sup>, Alexander Benes<sup>c,d</sup>, Roland Schoch<sup>e</sup>, Matthias Bauer<sup>e</sup>, Ralf Witte<sup>d</sup>, Andrew Dominic Fortes<sup>f</sup>, Emre Erdem<sup>g</sup>, Jochen Rohrer<sup>h</sup>, Oliver Clemens<sup>a,d\*</sup>

<sup>a</sup> Technische Universität Darmstadt, Institut für Materialwissenschaft, Fachgebiet Materialdesign durch Synthese, Alarich-Weiss-Straße 2, 64287 Darmstadt, Germany

<sup>b</sup> Technische Universität Darmstadt, Institut für Materialwissenschaft, Fachgebiet Dünne Schichten, Alarich-Weiss-Straße 2, 64287 Darmstadt, Germany

<sup>c</sup> Technische Universität Darmstadt, Institut für Materialwissenschaft, Gemeinschaftslabor Nanomaterialien, Alarich-Weiss-Straße 2, 64287 Darmstadt, Germany

<sup>d</sup> Karlsruher Institut für Technologie, Institut für Nanotechnologie, Hermann-von-Helmholtz-Platz 1, 76344 Eggenstein-Leopoldshafen, Germany

<sup>e</sup> Department Chemie, Universität Paderborn, Warburger Straße 100, 33098 Paderborn, Germany

<sup>f</sup> ISIS Facility, Rutherford Appleton Laboratory, Harwell Science and Innovation Campus, Didcot, Oxfordshire OX11 0QX, United Kingdom

<sup>g</sup> Albert-Ludwigs-Universität Freiburg, Institut für Physikalische Chemie, Albertstraße 21, 79104 Freiburg, Germany

<sup>h</sup> Technische Universität Darmstadt, Institut für Materialwissenschaft, Fachgebiet Materialmodellierung, Otto-Berndt-Straße 3, 64287 Darmstadt, Germany

\* Corresponding Author

Fax: +49 6151 16 20965

E-Mail: [oliver.clemens@md.tu-darmstadt.de](mailto:oliver.clemens@md.tu-darmstadt.de)

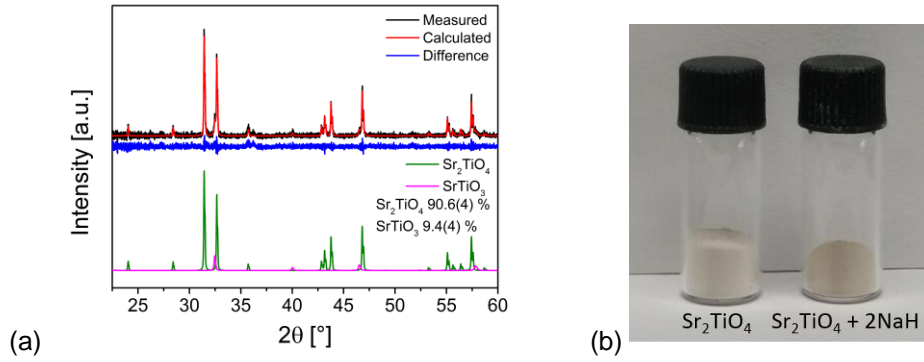

Figure S 1: (a) X-ray diffraction pattern and quantitative phase analysis of  $\text{Sr}_2\text{TiO}_4 + x \text{NaH}$  ( $x = 2$ ) after the attempted reduction; (b) photograph of  $\text{Sr}_2\text{TiO}_4$  and powder after reaction of  $\text{Sr}_2\text{TiO}_4 + x \text{NaH}$  ( $x = 2$ ) showing no color change, which would indicate the formation of low valent titanium species.

Table S 1: Refined lattice parameters and quantitative analysis of  $\text{Sr}_2\text{TiO}_4$ ,  $\text{Sr}_2\text{TiO}_3\text{F}_2$  and reduction reaction products  $\text{Sr}_2\text{TiO}_3\text{F}_2 + x \text{NaH}$  ( $0.25 \leq x \leq 3$ ).

| x in $\text{Sr}_2\text{TiO}_3\text{F}_2 + x \text{NaF}$ | Phase                                     | Space group   | Weight Percent [%] | Lattice Parameters |         |            |              |             |              |                               |
|---------------------------------------------------------|-------------------------------------------|---------------|--------------------|--------------------|---------|------------|--------------|-------------|--------------|-------------------------------|
|                                                         |                                           |               |                    | a [Å]              | b [Å]   | c [Å]      | $\alpha$ [°] | $\beta$ [°] | $\gamma$ [°] | Cell Volume [Å <sup>3</sup> ] |
| $\text{Sr}_2\text{TiO}_4$                               | $\text{Sr}_2\text{TiO}_4$                 | <i>I4/mmm</i> | 100.00             | 3.88479(8)         |         | 12.5943(4) |              |             |              | 190.07(1)                     |
| $\text{Sr}_2\text{TiO}_3\text{F}_2$                     | $\text{Sr}_2\text{TiO}_3\text{F}_2$       | <i>P4/nmm</i> | 95.7(1)            | 3.8043(6)          |         | 15.509(5)  |              |             |              | 224.46(9)                     |
|                                                         | $\text{SrF}_2$                            | <i>Fm-3m</i>  | 4.4(1)             |                    |         |            |              |             |              |                               |
| $\text{Sr}_2\text{TiO}_3\text{F}_{2-x}$                 | 0.25 $\text{Sr}_2\text{TiO}_3\text{F}_2$  | <i>P4/nmm</i> | 88.8(3)            | 3.807(1)           |         | 15.46(1)   |              |             |              | 224.0(2)                      |
|                                                         | intermediate phase 1                      | <i>P4/nmm</i> | 2.4(1)             | 3.834(8)           |         | 14.19(5)   |              |             |              | 208.(1)                       |
|                                                         | intermediate phase 2                      | <i>I4/mmm</i> | 18.0(8)            | 3.878(9)           |         | 12.67(7)   |              |             |              | 191.(1)                       |
|                                                         | NaF                                       | <i>Fm-3m</i>  | 1.6(2)             |                    |         |            |              |             |              |                               |
|                                                         | $\text{SrF}_2$                            | <i>Fm-3m</i>  | 4.3(1)             |                    |         |            |              |             |              |                               |
| 0.5                                                     | $\text{Sr}_2\text{TiO}_3\text{F}_2$       | <i>P4/nmm</i> | 55.0(4)            | 3.811(2)           |         | 15.44(1)   |              |             |              | 224.2(3)                      |
|                                                         | intermediate phase 1                      | <i>P4/nmm</i> | 2.6(1)             | 3.844(6)           |         | 14.19(5)   |              |             |              | 210.(1)                       |
|                                                         | intermediate phase 2                      | <i>I4/mmm</i> | 32.6(5)            | 3.880(3)           |         | 12.64(2)   |              |             |              | 190.3(5)                      |
|                                                         | NaF                                       | <i>Fm-3m</i>  | 4.9(2)             |                    |         |            |              |             |              |                               |
|                                                         | $\text{SrF}_2$                            | <i>Fm-3m</i>  | 4.0(1)             |                    |         |            |              |             |              |                               |
| 0.75                                                    | $\text{Sr}_2\text{TiO}_3\text{F}_2$       | <i>P4/nmm</i> | 12.5(3)            | 3.806(5)           |         | 15.40(4)   |              |             |              | 223.1(9)                      |
|                                                         | intermediate phase 1                      | <i>P4/nmm</i> | 6.5(2)             | 3.89(1)            |         | 13.93(6)   |              |             |              | 210.(2)                       |
|                                                         | $\text{Sr}_2\text{TiO}_3\text{FH}_{0.48}$ | <i>P-1</i>    | 67.8(4)            | 5.59(1)            | 5.54(1) | 12.91(1)   | 90.48(1)     | 89.48 (2)   | 89.46(1)     | 399.4(1)                      |
|                                                         | NaF                                       | <i>Fm-3m</i>  | 9.7(3)             |                    |         |            |              |             |              |                               |
|                                                         | $\text{SrF}_2$                            | <i>Fm-3m</i>  | 3.6(1)             |                    |         |            |              |             |              |                               |
| 1                                                       | $\text{Sr}_2\text{TiO}_3\text{FH}_{0.48}$ | <i>P-1</i>    | 76.3(5)            | 5.571(5)           | 5.56(1) | 12.907(2)  | 91.25(2)     | 89.351(10)  | 89.564(6)    | 396.5(1)                      |
|                                                         | intermediate phase 1                      | <i>P4/nmm</i> | 6.3(5)             | 3.90(2)            |         | 13.79(9)   |              |             |              | 210.(3)                       |
|                                                         | NaF                                       | <i>Fm-3m</i>  | 14.4(3)            |                    |         |            |              |             |              |                               |
|                                                         | $\text{SrF}_2$                            | <i>Fm-3m</i>  | 2.94(8)            |                    |         |            |              |             |              |                               |
| 1.25                                                    | $\text{Sr}_2\text{TiO}_3\text{FH}_{0.48}$ | <i>P-1</i>    | 39.9(4)            | 5.5795(10)         | 5.52(1) | 13.025(3)  | 90.75(2)     | 89.42(2)    | 89.39(1)     | 400.8(10)                     |

|                  |                                           |               |         |            |         |            |           |           |           |           |
|------------------|-------------------------------------------|---------------|---------|------------|---------|------------|-----------|-----------|-----------|-----------|
|                  | $\text{Sr}_2\text{TiO}_3\text{H}_{1.48}$  | <i>I4/mmm</i> | 41.1(4) | 3.914(2)   |         | 12.69(4)   |           |           |           | 194.4(6)  |
|                  | NaF                                       | <i>Fm-3m</i>  | 16.1(3) |            |         |            |           |           |           |           |
|                  | $\text{SrF}_2$                            | <i>Fm-3m</i>  | 2.9(1)  |            |         |            |           |           |           |           |
| 1.5              | $\text{Sr}_2\text{TiO}_3\text{FH}_{0.48}$ | <i>P-1</i>    | 33.0(7) | 5.5931(19) | 5.54(2) | 12.917(5)  | 91.3(3)   | 90.0(15)  | 89.9(9)   | 400.06(4) |
|                  | $\text{Sr}_2\text{TiO}_3\text{H}_{1.48}$  | <i>I4/mmm</i> | 43.6(7) | 3.909(3)   |         | 12.70(5)   |           |           |           | 194.1(8)  |
|                  | NaF                                       | <i>Fm-3m</i>  | 20.1(5) |            |         |            |           |           |           |           |
|                  | $\text{SrF}_2$                            | <i>Fm-3m</i>  | 3.3(1)  |            |         |            |           |           |           |           |
| 1.75             | $\text{Sr}_2\text{TiO}_3\text{FH}_{0.48}$ | <i>P-1</i>    | 21.1(5) | 5.585(7)   | 5.54(1) | 12.920(19) | 90.83(15) | 90.83(15) | 89.73(18) | 399.7(11) |
|                  | $\text{Sr}_2\text{TiO}_3\text{H}_{1.48}$  | <i>I4/mmm</i> | 54.0(5) | 3.909(2)   |         | 12.70(3)   |           |           |           | 194.0(5)  |
|                  | NaF                                       | <i>Fm-3m</i>  | 21.1(4) |            |         |            |           |           |           |           |
|                  | $\text{SrF}_2$                            | <i>Fm-3m</i>  | 3.0(1)  |            |         |            |           |           |           |           |
| 2                | $\text{Sr}_2\text{TiO}_3\text{H}_{1.48}$  | <i>I4/mmm</i> | 71.9(1) | 3.9100(1)  |         | 12.722(1)  |           |           |           | 194.5(2)  |
|                  | NaF                                       | <i>Fm-3m</i>  | 22.5(3) |            |         |            |           |           |           |           |
|                  | $\text{NaF}_{1-z}\text{H}_z$              | <i>Fm-3m</i>  | 4.4(1)  |            |         |            |           |           |           |           |
|                  | $\text{SrF}_2$                            | <i>Fm-3m</i>  | 1.2(1)  |            |         |            |           |           |           |           |
| 2.5 (excess NaH) | $\text{Sr}_2\text{TiO}_3\text{H}_{1.48}$  | <i>I4/mmm</i> | 67.0(6) | 3.900(3)   |         | 12.75(3)   |           |           |           | 193.9(5)  |
|                  | NaF                                       | <i>Fm-3m</i>  | 14.3(4) |            |         |            |           |           |           |           |
|                  | $\text{NaF}_{1-z}\text{H}_z$              | <i>Fm-3m</i>  | 15.8(6) |            |         |            |           |           |           |           |
|                  | $\text{SrF}_2$                            | <i>Fm-3m</i>  | 3.0(1)  |            |         |            |           |           |           |           |
| 3 (excess NaH)   | $\text{Sr}_2\text{TiO}_3\text{H}_{1.48}$  | <i>I4/mmm</i> | 60.8(9) | 3.907(2)   |         | 13.01(3)   |           |           |           | 198.5(5)  |
|                  | NaF                                       | <i>Fm-3m</i>  | 14.4(6) |            |         |            |           |           |           |           |
|                  | $\text{NaF}_{1-z}\text{H}_z$              | <i>Fm-3m</i>  | 16.3(9) |            |         |            |           |           |           |           |
|                  | $\text{SrF}_2$                            | <i>Fm-3m</i>  | 1.0(2)  |            |         |            |           |           |           |           |

## Scanning Electron Microscopy Study

Scanning electron microscopy (SEM) images were recorded with a Philips XL30 FEG secondary electron microscope at a voltage of 30 kV.

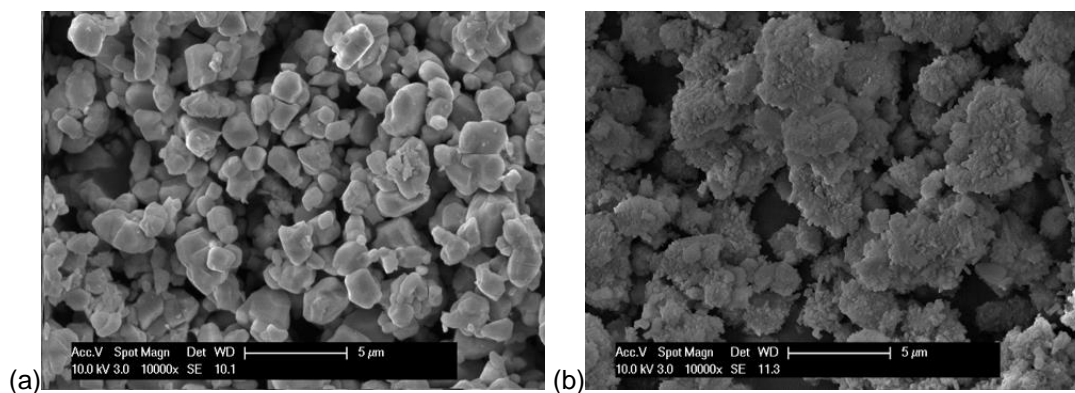

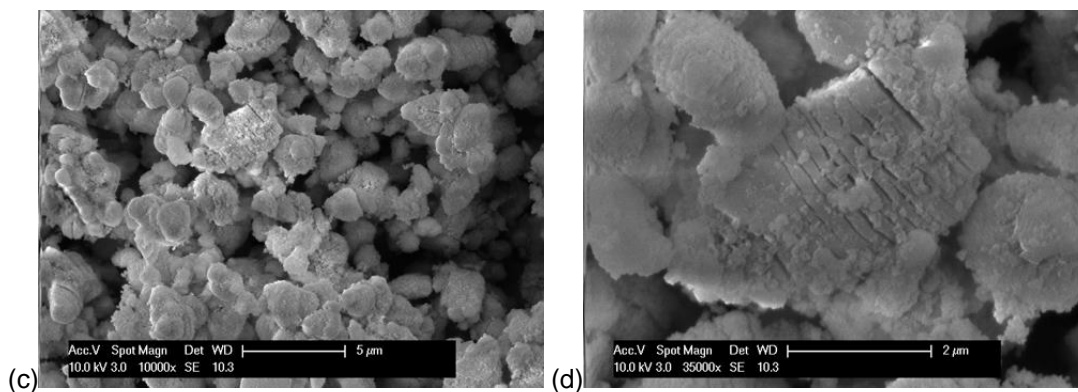

Figure S 2: SEM images of  $Sr_2TiO_3F_2$  (a), unwashed  $Sr_2TiO_3H_{1.48}$  with rough porous layer of NaF on top of particles (b), and washed  $Sr_2TiO_3$  showing a layer-like breaking of particles (c and d).

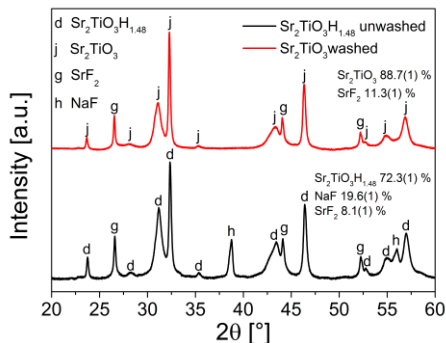

Figure S 3: X-ray diffraction patterns and quantitative phase analysis of reduction reaction product  $Sr_2TiO_3F_2 + x NaH$  ( $x = 2$ ) before and after removal of NaF byproduct by washing with 0.25 M  $NH_4Cl$  in methanol.

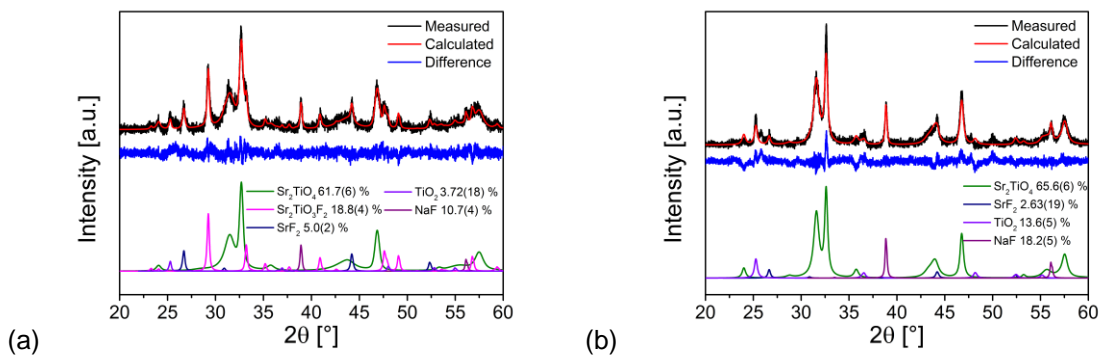

Figure S 4: (a) X-ray diffraction pattern and quantitative phase analysis of re-oxidized  $Sr_2TiO_3FH_{0.48}$  ( $x=1$ ); (b) X-ray diffraction pattern and quantitative phase analysis of re-oxidized  $Sr_2TiO_3H_{1.48}$  ( $x=2$ ).

## Electron Paramagnetic Resonance

X-band (9.86 GHz) EPR measurements were performed by a BRUKER EMX spectrometer with the aid of a rectangular TE102 resonator from Bruker. The offset in the magnetic field and the exact g-factors in X-band measurements were determined with a polycrystalline DPPH (2-diphenyl-1-picrylhydrazyl) reference sample of well-known g-factor ( $g = 2.0036$ ). The EPR spectral analysis has been performed using the WINEPR program from Bruker. The following EPR experimental parameters were used: microwave power: 1 mW; modulation amplitude: 2 G; time constant: 163.84 ms; receiver gain:  $2 \times 10^4$ . To determine EPR signal quantitatively we employed a spin counting procedure as described previously<sup>1-2</sup>.

Room temperature X-band EPR measurements of  $\text{Sr}_2\text{TiO}_3\text{F}_2$ , as well as of  $\text{Sr}_2\text{TiO}_3\text{FH}_{0.48}$  and  $\text{Sr}_2\text{TiO}_3\text{H}_{1.48}$  are shown in Figure S 5 a. EPR measurements are very sensitive to the presence of paramagnetic species, such as electronic charge carriers on  $\text{Ti}^{3+}$  ( $\text{Ti}^{4+}$  and  $\text{Ti}^{2+}$  are EPR inactive), and / or electronic charge carriers located on anion vacancies. Therefore, as expected, no signal is observed for the diamagnetic  $\text{Sr}_2\text{TiO}_3\text{F}_2$ . On the other hand, for  $\text{Sr}_2\text{TiO}_3\text{FH}_{0.48}$  and  $\text{Sr}_2\text{TiO}_3\text{H}_{1.48}$ , EPR signals could be detected and indicate the presence of unpaired electrons at ambient temperature, as would be expected for  $\text{Ti}^{3+}$ . For both samples, different paramagnetic species are indicated by two strong EPR active signals (a broad Gaussian line and a sharp line with overlapping EPR centers). The g-values for both sharp signals are in the order of 2.0, which agrees well with what has been previously reported for  $\text{Ti}^{3+}$  species<sup>3-5</sup>. The fact that more than one EPR signal has been observed could be explained by different degrees of structural disorder in the compound, e.g. more or less direct neighbours of  $\text{Ti}^{3+}$  species. Broader signals were also found for other Ti compounds, where it was explained by distortions of the local octahedron to lower symmetry and/or distribution of local structural distortions around the active center. Overall, the presence of different signals with different width is in agreement with the fact that  $\text{Sr}_2\text{TiO}_3\text{FH}_{0.48}$  and  $\text{Sr}_2\text{TiO}_3\text{H}_{1.48}$  show strong degrees of structural disorder which must result in different local configurations, and which would result in a distribution of signals around some mean average.

The intensity of the EPR signal of  $\text{Ti}^{3+}$  signal is strongly dependent on temperature, and low temperatures are often required to be even able to detect this species<sup>6-7</sup>. By integrating the first derivative of the EPR signal, one can obtain the concentration of the EPR centers, which are active at ambient temperature (Figure S 5 b and c,  $1.7 \times 10^{18}$  spins/g and  $2.9 \times 10^{17}$  spins/g for  $\text{Sr}_2\text{TiO}_3\text{H}_{1.48}$  and  $\text{Sr}_2\text{TiO}_3\text{H}_{0.48}$ , respectively). In agreement with the previous literature on topochemically reduced titanates<sup>8</sup> (which to the best of our knowledge did not evaluate the EPR signal quantitatively and but only qualitatively), the overall amount of  $\text{Ti}^{3+}$  and/or free electrons in the sample at ambient temperature given in the article is therefore based on the evaluation of the magnetic data and the compositional analysis.

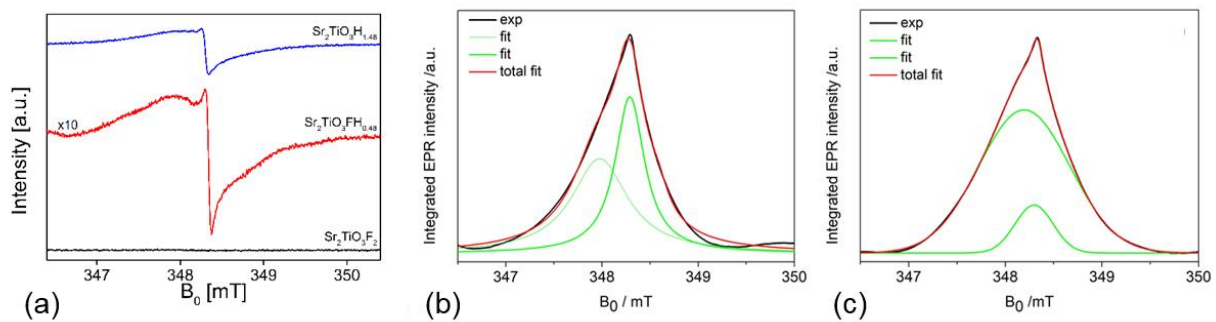

Figure S 5: (a) Room temperature X-band EPR spectra of  $\text{Sr}_2\text{TiO}_3\text{F}_2$ ,  $\text{Sr}_2\text{TiO}_3\text{FH}_{0.48}$  and  $\text{Sr}_2\text{TiO}_3\text{H}_{1.48}$ ; (b) Quantification of the  $\text{Ti}^{3+}$  species, which are EPR active at room temperature of  $\text{Sr}_2\text{TiO}_3\text{FH}_{0.48}$ ; (c) Quantification of the  $\text{Ti}^{3+}$  species, which are EPR active at room temperature of  $\text{Sr}_2\text{TiO}_3\text{H}_{1.48}$ .

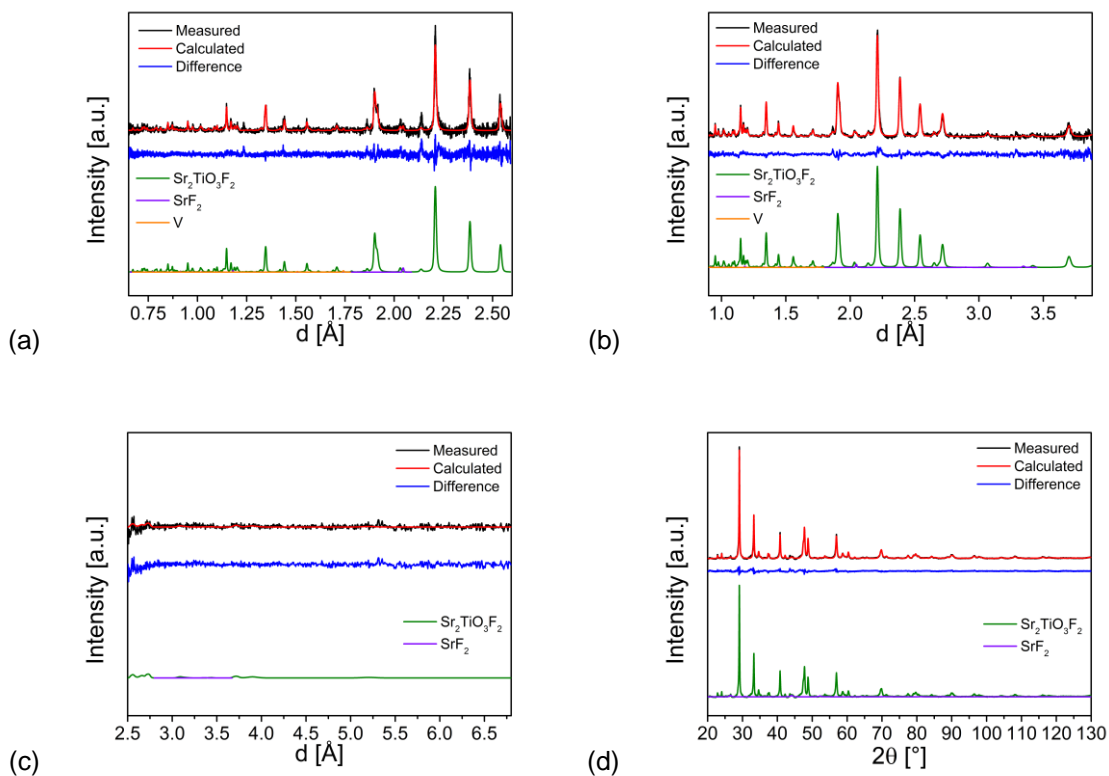

Figure S 6: Coupled Rietveld analysis of  $\text{Sr}_2\text{TiO}_3\text{F}_2$  (space group:  $P4/nmm$ ) of HRPD bank 1 data (a), HRPD bank 2 data (b), HRPD bank 3 data (c), and XRD data (d).

Table S 2: Structural parameters for  $Sr_2TiO_3F_2$  (space group:  $P4/nmm$ ) from coupled Rietveld analysis of XRD and NPD data.

| Atom                                     | Wyckoff site | x          | y            | z               | Occupancy                        |
|------------------------------------------|--------------|------------|--------------|-----------------|----------------------------------|
| Sr1                                      | 2c           | 3/4        | 3/4          | 0.0976(1)       | 1                                |
| Sr2                                      | 2c           | 3/4        | 3/4          | 0.3949(1)       | 1                                |
| Ti                                       | 2c           | 1/4        | 1/4          | 0.2584(2)       | 1                                |
| O1                                       | 4f           | 1/4        | 3/4          | 0.2861(2)       | 1                                |
| O2                                       | 2c           | 1/4        | 1/4          | 0.1579(3)       | 1                                |
| F1                                       | 2c           | 1/4        | 1/4          | 0.4444(1)       | 1                                |
| F2                                       | 2a           | 1/4        | 3/4          | 0               | 1.03(1)                          |
| <b>a [Å]</b>                             | 3.7929(1)    |            | <b>c [Å]</b> | 15.463(2)       |                                  |
| <b><math>R_{wp}</math> (XRD+NPD) [%]</b> | 2.50         | <b>GOF</b> | 2.43         | $R_{Bragg}$ [%] | 0.94 (XRD)<br>1.50 (NPD, bank 2) |

## Extended X-ray Absorption Fine Structure

The accuracy of the determined distances is 1 %, of the Debye-Waller-like factor 10 % and of the coordination numbers depending of the distance 10 % in case of distances shorter than 2.5 Å and -20 % for larger distances<sup>9</sup>. Initial fitting values for coordination numbers and distances were adopted from Rietveld-analysis and afterwards iterated freely in every fit as well as the Debye-Waller-like factor and the amplitude-reducing factor.

For the fitting procedure a  $\chi(k)$ -range from 3 to 11 was used for every substance. The  $\chi(k)$  spectra are shown in Figure S 7.

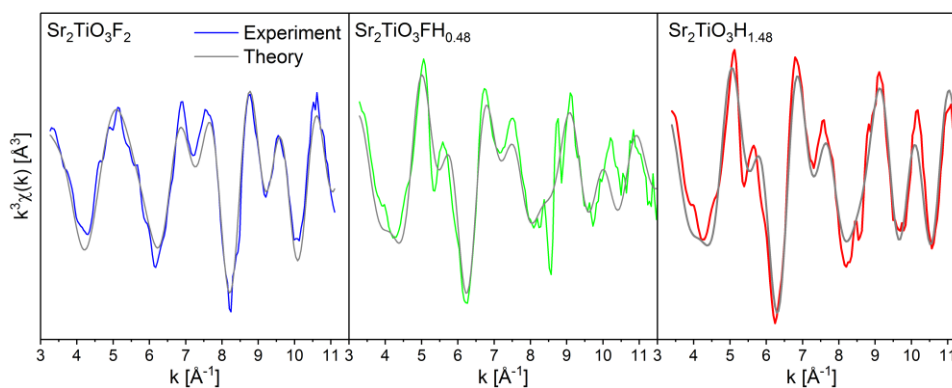

Figure S 7:  $\chi(k)$  spectra of  $Sr_2TiO_3F_2$  (left),  $Sr_2TiO_3FH_{0.48}$  (middle) and  $Sr_2TiO_3H_{1.48}$  (right).

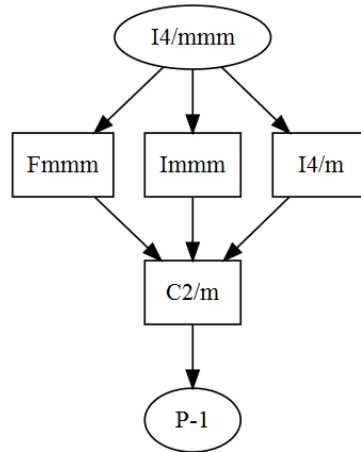

Figure S 8: Symmetry tree ([http://www.cryst.ehu.es/cgi-bin/cryst/programs/nph-show\\_graph](http://www.cryst.ehu.es/cgi-bin/cryst/programs/nph-show_graph)) for a series of translationengleiche symmetry lowerings to triclinic, which maintain translational symmetry.



Table S 3: Comparison of different structural distortion models for the analysis of powder diffraction data.

| (100) <sub>h</sub> 4/mmm<br>NPD, bank 1 | (220) <sub>h</sub> 4/mmm at 1.39 Å / (206) <sub>h</sub> 4/mmm at 1.46 Å<br>NPD, bank 1 | (200) <sub>h</sub> 4/mmm<br>XRD |                                                                                 |
|-----------------------------------------|----------------------------------------------------------------------------------------|---------------------------------|---------------------------------------------------------------------------------|
|                                         |                                                                                        |                                 | Tetragonal<br>$R_{wp}$<br>(XRD+NPD)<br>= 3.55 %                                 |
|                                         |                                                                                        |                                 | Orthorhombic<br>$R_{wp}$<br>(XRD+NPD)<br>= 3.51 %                               |
|                                         |                                                                                        |                                 | Monoclinic ( $\alpha$<br>$\neq 90^\circ$ )<br>$R_{wp}$<br>(XRD+NPD)<br>= 3.36 % |
|                                         |                                                                                        |                                 | Monoclinic ( $\beta$<br>$\neq 90^\circ$ )<br>$R_{wp}$<br>(XRD+NPD)<br>= 3.43 %  |
|                                         |                                                                                        |                                 | Monoclinic ( $\gamma$<br>$\neq 90^\circ$ )<br>$R_{wp}$<br>(XRD+NPD)<br>= 3.24 % |
|                                         |                                                                                        |                                 | Triclinic<br>$R_{wp}$<br>(XRD+NPD)<br>= 3.10 %                                  |

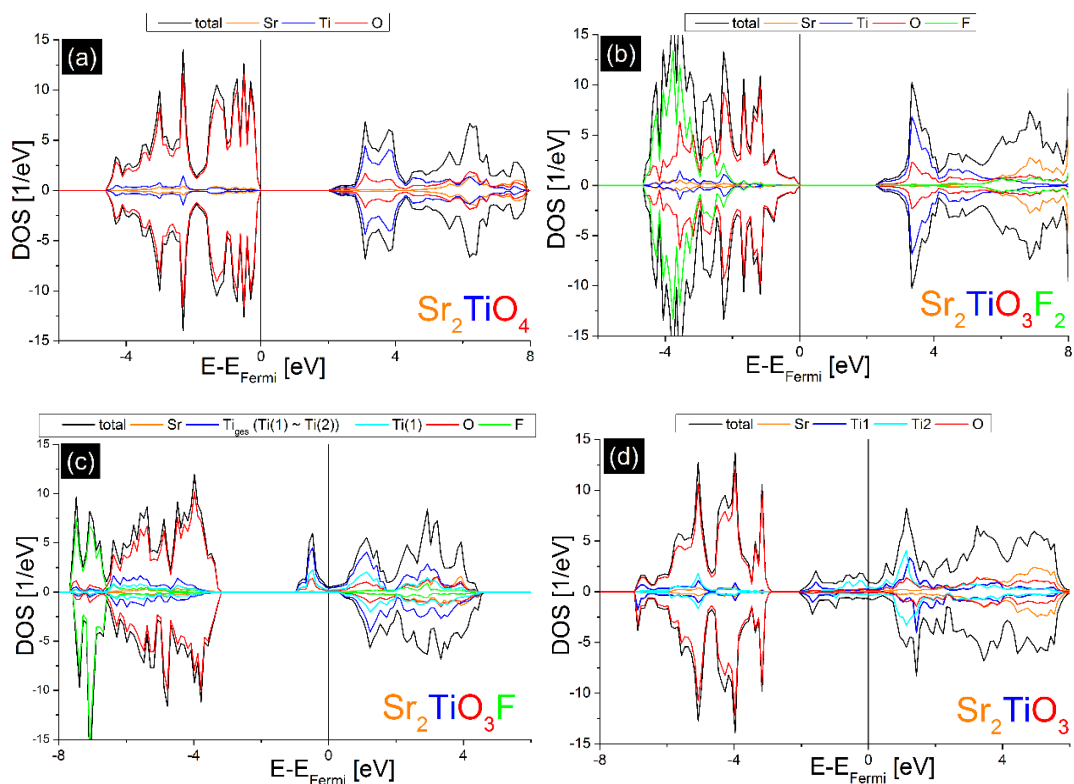

Figure S 9: DOS and pDOS of  $\text{Sr}_2\text{TiO}_4$  (a),  $\text{Sr}_2\text{TiO}_3\text{F}_2$  (b),  $\text{Sr}_2\text{TiO}_3\text{F}$  (c), and  $\text{Sr}_2\text{TiO}_3$  (d). The DOS are shown for the for the most stable configurations of the anion lattice with  $U_{\text{eff}} = 2$  eV.

Table S 4 Calculated reaction enthalpies and free reaction enthalpies from energies of optimized structures calculated by the DFT+U method considering the formation of  $\text{H}_2\text{O}$  and  $\text{HF}$ . The entropic contributions were calculated from the standard formation entropy of hydrogen,  $\text{H}_2\text{O}$  and  $\text{HF}$  at the reaction temperature of 573 K<sup>10</sup>

| Reaction equation                                                                                                                                            | $\Delta H$ [eV]      | $-T\Delta S$ [eV]                             | $\Delta G$ [eV]  |
|--------------------------------------------------------------------------------------------------------------------------------------------------------------|----------------------|-----------------------------------------------|------------------|
|                                                                                                                                                              | < 0 →<br>exothermal  | at T = 573 K                                  | < 0 → exergonic  |
|                                                                                                                                                              | > 0 →<br>endothermal | = 300 °C <sup>10</sup> for<br>gaseous species | > 0 → endergonic |
| $\text{Sr}_2\text{TiO}_4 + \text{NaH} \rightarrow$<br>$\text{Sr}_2\text{TiO}_{3.5} + \frac{1}{2} \text{Na}_2\text{O} + \frac{1}{2} \text{H}_2(\text{g})$     | +1.09                | -0.45                                         | +0.63            |
| $\text{Sr}_2\text{TiO}_4 + \text{NaH} \rightarrow$<br>$\text{Sr}_2\text{TiO}_3 + \frac{1}{2} \text{Na}_2\text{O} + \frac{1}{2} \text{H}_2\text{O}(\text{g})$ | +2.31                | -0.64                                         | +1.67            |
| $\text{Sr}_2\text{TiO}_3\text{F}_2 + \text{NaH} \rightarrow$<br>$\text{Sr}_2\text{TiO}_3\text{F} + \text{NaF} + \frac{1}{2} \text{H}_2(\text{g})$            | +0.10                | -0.45                                         | -0.35            |
| $\text{Sr}_2\text{TiO}_3\text{F}_2 + \text{NaH} \rightarrow$<br>$\text{Sr}_2\text{TiO}_3 + \text{NaF} + \text{HF}(\text{g})$                                 | +2.72                | -1.07                                         | +1.65            |

## References

1. Parashar, S. K. S.; Murty, B. S.; Repp, S.; Weber, S.; Erdem, E., Investigation of intrinsic defects in core-shell structured ZnO nanocrystals. *Journal of Applied Physics* **2012**, *111* (11), 113712.
2. Schneider, J. J.; Hoffmann, R. C.; Engstler, J.; Dilfer, S.; Klyszcz, A.; Erdem, E.; Jakes, P.; Eichel, R. A., Zinc oxide derived from single source precursor chemistry under chimie douce conditions: formation pathway, defect chemistry and possible applications in thin film printing. *Journal of Materials Chemistry* **2009**, *19* (10), 1449-1457.
3. Laguta, V. V.; Glinchuk, M. D.; Kuzian, R. O.; Nokhrin, S. N.; Bykov, I. P.; Jastrabik, L.; Rosa, J., Electron Spin Resonance of  $Ti^{3+}$  in  $KTa_{0.9}Nb_{0.1}O_3$ . *Solid State Commun.* **2002**, *122*, 277-281.
4. Xiong, L.-B.; Li, J.-L.; Yang, B.; Yu, Y.,  $Ti^{3+}$  in the Surface of Titanium Dioxide: Generation, Properties and Photocatalytic Application. *Journal of Nanomaterials* **2012**, *2012*, 1-13.
5. Xin, X.; Xu, T.; Wang, L.; Wang, C.,  $Ti^{3+}$ -self doped brookite  $TiO_2$  single-crystalline nanosheets with high solar absorption and excellent photocatalytic  $CO_2$  reduction. *Sci Rep* **2016**, *6*, 23684.
6. Corradi, G.; Zaritskii, I. M.; Hofstaetter, A.; Polgar, K.; Rakitina, L. G.,  $Ti^{3+}$  on Nb site: A paramagnetic Jahn-Teller center in vacuum-reduced  $LiNbO_3:Mg:Ti$  single crystals. *Physical Review B* **1998**, *58* (13), 8329-8337.
7. ERDEM, E.; JAKES, P.; EICHEL, R.-A.; SINCLAIR, D. C.; PASHA, M.; REANEY, I. M., FORMATION OF  $(Ti_{Ti} - V_O^{**})^{\bullet}$  DEFECT DIPOLES IN  $BaTiO_3$  CERAMICS HEAT-TREATED UNDER REDUCED OXYGEN PARTIAL-PRESSURE. *Functional Materials Letters* **2010**, *03* (01), 65-68.
8. Poussacq, T.; Kabbour, H.; Colis, S.; Vezin, H.; Saitzek, S.; Gardoll, O.; Tassel, C.; Kageyama, H.; Robert, C. L.; Mentré, O., Reduction of  $Ln_2Ti_2O_7$  Layered Perovskites: A Survey of the Anionic Lattice, Electronic Features, and Potentials. *Chemistry of Materials* **2017**, *29* (3), 1047-1057.
9. Bauer, M.; Bertagnolli, H., X-Ray Absorption Spectroscopy – the Method and Its Applications. Schäfer, P. R.; Schmidt, P. P. C., Eds. Wiley-VCH Weinheim, 2012; pp 231-270.
10. Chase Jr., M. W., NIST-JANAF Thermochemical Tables, Fourth Edition, Monograph 9 (Part I and Part II). *Journal of Physical and Chemical Reference Data* **1998**.
